# Supplementary material for: Short-Term Annoyance Due to Night-Time Road, Railway, and Air Traffic Noise: Role of the Noise Source, the Acoustical Metric, and Non-Acoustical Factors
Source: MDPI journal article supplement (doi:10.3390/ijerph18094647), 2021-04-27
Supplement: s1 [file s1]

**Table S1.** Averaged road traffic noise exposure and road traffic composition over the study nights for the individual time in bed for every participant.

| ID        | Window position | Mean (SD) of $L_{Aeq,night}$ of traffic noise indoors | Mean (SD) of number of road traffic events | Road traffic composition in % |       |           |             |
|-----------|-----------------|-------------------------------------------------------|--------------------------------------------|-------------------------------|-------|-----------|-------------|
|           |                 |                                                       |                                            | Passenger car                 | Van   | Truck/Bus | Two-wheeler |
| 1         | closed          | 19.58 (.19)                                           | 178.25 (21.64)                             | 70.97                         | 13.04 | 8.56      | 7.43        |
| 4         | tilted          | 28.08 (.67)                                           | 171.75 (19.31)                             | 64.19                         | 18.63 | 15.14     | 2.04        |
| 22        | tilted          | 29.83 (1.1)                                           | 122.75 (6.19)                              | 74.75                         | 8.76  | 9.37      | 7.13        |
| 27        | alternating     | 27.05 (4.31)                                          | 128.75 (17.63)                             | 32.04                         | 37.09 | 29.71     | 1.17        |
| 42 + 43   | tilted          | 31.73 (.43)                                           | 215.75 (42.60)                             | 60.95                         | 22.36 | 12.98     | 3.71        |
| 57 + 58   | alternating     | 24.83 (7.0)                                           | 224.50 (37.01)                             | 77.39                         | 13.25 | 7.68      | 1.67        |
| 213       | closed          | 25.65 (1.77)                                          | 296.25 (54.74)                             | 64.47                         | 13.67 | 20.34     | 1.52        |
| 249 + 250 | tilted          | 25.93 (4.16)                                          | 130.67 (2.89)                              | 61.74                         | 8.93  | 16.84     | 12.5        |
| 263       | closed          | 26.25 (.79)                                           | 308 (67.56)                                | 72.48                         | 13.34 | 10.8      | 4.38        |
| 273       | tilted          | 32.55 (1.86)                                          | 434 (41.47)                                | 53.69                         | 15.96 | 28.34     | 2.02        |
| 274       | tilted          | 30.1 (2.47)                                           | 458 (227.554)                              | 69.43                         | 22    | 5.73      | 2.84        |
| 276       | alternating     | 31.07 (8.93)                                          | 275.33 (162.792)                           | 38.02                         | 23.36 | 37.41     | 1.21        |
| 291       | tilted          | 28.75 (1.44)                                          |                                            | No data available             |       |           |             |
| 303       | closed          | 23.4 (2.22)                                           | 214.5 (80.04)                              | 62.94                         | 15.5  | 17.72     | 3.85        |
| 304       | closed          | 19.6 (1.13)                                           | 98.75 (66.01)                              | 39.75                         | 26.84 | 23.54     | 9.87        |
| 307 + 308 | tilted          | 30.78 (1.67)                                          | 341 (6.27)                                 | 72.8                          | 14.88 | 9.68      | 2.64        |
| 316       | alternating     | 43.85 (.66)                                           | 412.25 (18.19)                             | 71.01                         | 11.89 | 12.98     | 4.12        |
| 318       | tilted          | 35.23 (2.3)                                           | 365.75 (34.99)                             | 65.41                         | 22.62 | 6.63      | 5.33        |
| 324       | tilted          | 29.75 (2.38)                                          | 471.75 (42.14)                             | 58.13                         | 18.92 | 5.14      | 4.13        |
| 340       | closed          | 23.58 (1.4)                                           | 357.75 (60.13)                             | 74.42                         | 15.02 | 5.52      | 5.03        |
| 343       | tilted          | 26.2 (1.41)                                           | 192.5 (55.98)                              | 54.55                         | 28.05 | 5.06      | 12.34       |
| 344       | closed          | 21.18 (.72)                                           |                                            | No data available             |       |           |             |
| 351       | tilted          | 24 (.61)                                              | 259 (34.70)                                | 72.85                         | 13.64 | 6.82      | 6.69        |
| 356       | open            | 38.15 (.8)                                            | 290.5 (22.49)                              | 60.24                         | 20.57 | 13.51     | 5.68        |

**Table S1.** (continued)

| ID  | Window position | Mean (SD) of $L_{Aeq,night}$ of traffic noise indoors | Mean (SD) of number of road traffic events | Road traffic composition in % |       |           |             |
|-----|-----------------|-------------------------------------------------------|--------------------------------------------|-------------------------------|-------|-----------|-------------|
|     |                 |                                                       |                                            | Passenger car                 | Van   | Truck/Bus | Two-wheeler |
| 357 | closed          | 21.33 (.51)                                           | 295.25 (29.47)                             | 66.64                         | 13.63 | 13.97     | 5.76        |
| 368 | closed          | 23.93 (.83)                                           | 221.25 (36.77)                             | 73.45                         | 9.15  | 14.69     | 2.71        |
| 372 | closed          | 21.78 (.69)                                           | 469 (71.73)                                | 77.56                         | 12.74 | 3.20      | 6.50        |
| 375 | tilted          | 26.63 (1.21)                                          | 130.5 (7.68)                               | 69.92                         | 1.72  | 11.30     | 17.05       |
| 376 | closed          | 25.7 (2.86)                                           | 444 (139.16)                               | 72.97                         | 13.63 | 6.02      | 7.38        |
| 377 | closed          | 26.15 (.93)                                           | 554.75 (59.03)                             | 62.33                         | 15.68 | 19.69     | 2.3         |
| 381 | closed          | 27.08 (2.47)                                          | 700 (223.09)                               | 61.43                         | 17.43 | 18.32     | 2.82        |
| 384 | tilted          | 34.23 (.99)                                           | 208 (68.40)                                | 75.12                         | 16.35 | 3.73      | 4.81        |
| 390 | closed          | 27.68 (.63)                                           | 463.25 (80.47)                             | 79.76                         | 10.9  | 6.53      | 2.81        |
| 395 | closed          | 23.35 (.68)                                           | 353.5 (33.81)                              | 78.64                         | 11.74 | 8.63      | 3.82        |
| 400 | alternating     | 37.6 (.83)                                            | No data available                          |                               |       |           |             |
| 435 | closed          | 25.33 (.92)                                           | No data available                          |                               |       |           |             |

$L_{Aeq,night}$  was derived from the acoustical recordings of 156 nights. Number of nocturnal road traffic events and its percentual composition was derived from the information of 139 nights provided by the traffic counter. Two ID-numbers in one cell mean that participants were investigated at the same location, same date and same time in bed. An alternating window position means that participants changed the position (open, closed, tilted) over the study nights. Two-wheeler contains motorized vehicles, but also bicycles. ID means the number of participant.
