# Supplementary material for: Short-Term Annoyance Due to Night-Time Road, Railway, and Air Traffic Noise: Role of the Noise Source, the Acoustical Metric, and Non-Acoustical Factors
Source: MDPI journal article supplement (doi:10.3390/ijerph18094647), 2021-04-27
Supplement: s1 [file s1]

**Table S4.** Main characteristics of the current study and those referred to within the discussion and conclusions.

| Publication   | Study setting              | Traffic noise source    | Acoustical variables                                                                | Noise ranges                                                          | Non-acoustical variables                                                                                       | Outcome                                                               |
|---------------|----------------------------|-------------------------|-------------------------------------------------------------------------------------|-----------------------------------------------------------------------|----------------------------------------------------------------------------------------------------------------|-----------------------------------------------------------------------|
| Current study | Field study                | Road, rail, aircraft    | $L_{Aeq,night}$ , number of events, etc.                                            | $L_{Aeq,night}$ : 19 – 49 dB, number of events: 0 - 924               | Sleep quality, adaptation to traffic noise, assessment of transportation source, etc.                          | Short-term annoyance                                                  |
| [8]           | Meta-Analysis              | Aircraft, road, railway | Day-night level (DNL), day-evening-night level (DENL) calculated for outside        | DENL and DNL: 45 – 75 dB(A)                                           | -                                                                                                              | Long-term annoyance                                                   |
| [11]          | Questionnaire survey       | Road, railway, aircraft | DENL, Intermittency Ratio (IR) calculated for outside                               | DENL: 30 – 85 B(A)                                                    | Age, sex, education level, etc.                                                                                | Long-term annoyance                                                   |
| [12]          | Field study                | Railway, aircraft       | Number of events, duration of events, $L_{Aeq}$ , etc. measured inside              | Number of railway events: 0 - 150                                     | Age, gender                                                                                                    | Short-term annoyance                                                  |
| [15]          | Questionnaire survey       | Road                    | DENL, number of events, maximal noise level, $L_{eq,night}$ , etc. measured outside | $L_{Aeq,night}$ : 32 – 74 dB                                          | Subjective noise sensitivity, age, length of residence, etc.                                                   | Long-term annoyance                                                   |
| [16]          | Field study                | Railway                 | $L_{Aeq,night}$ , number of events measured inside                                  | Number of events: 8 - 183                                             | Adaptation to traffic noise, subjective perception of noise load, length of residence, noise sensitivity, etc. | Short-term annoyance, self-reported sleep disturbances, pre-annoyance |
| [17]          | Laboratory and field study | Aircraft                | $L_{Aeq,night}$ , number of events measured inside                                  | $L_{Aeq,night}$ : approximately 20 – 50 dB, number of events: 4 - 100 | Age, adaption to traffic noise, pre-annoyance due to traffic noise, etc.                                       | Short-term annoyance                                                  |

**Table S4.** (continued)

| Publication | Study setting | Traffic noise source | Acoustical variables                                                                    | Noise ranges                                                                  | Non-acoustical variables                                                             | Outcome                                                       |
|-------------|---------------|----------------------|-----------------------------------------------------------------------------------------|-------------------------------------------------------------------------------|--------------------------------------------------------------------------------------|---------------------------------------------------------------|
| [19]        | Field study   | Aircraft             | $L_{Aeq,night}$ , number of events                                                      | $L_{Aeq,night}$ : 0 – 50 dB                                                   | Long-term annoyance, noise sensitivity, adaption to traffic noise, etc.              | Short-term annoyance                                          |
| [21]        | Review        | Aircraft             | Maximum sound pressure level ( $L_{Amax}$ ), $L_{Aeq}$ , Sound-exposure level ( $SEL$ ) | $L_{Aeq}$ : 35 – 75 dB,<br>$L_{Amax}$ : 30 – 110 dB,<br>$SEL$ : < 75 – 95+ dB | Short-term annoyance, sleep disturbance, tiredness, etc.                             | Long-term annoyance, health effects, etc.                     |
| [22]        | Field study   | Aircraft             | $L_{Amax}$ , number of events, $L_{Aeq}$ , etc. measured outside                        | -                                                                             | Long-term annoyance, noise sensitivity, time of day, domestic noise insulation, etc. | Short-term annoyance                                          |
| [34]        | Field study   | Road                 | $L_{Aeq}$ measured inside and outside                                                   | Outside: < 45 -65+ dB(A)                                                      | Window position, sound insulation, etc.                                              | Difference between external and internal sound level          |
| [35]        | Field study   | Road, aircraft       | $L_{Amax}$ measured inside and outside                                                  | Outside: approximately 35 - 90 dB(A), inside: approximately 20 – 70 dB(A)     | Window position                                                                      | Difference between external and internal sound pressure level |
| [37]        | Meta-Analysis | Aircraft             | Number of movements derived from survey reports and airport data                        | -                                                                             | -                                                                                    | Community Tolerance Level ( $CTL$ )                           |
| [38]        | Review        | Aircraft             | Number of movements, $DNL$                                                              | -                                                                             | -                                                                                    | $CTL$                                                         |

**Table S4.** (continued)

| Publication | Study setting        | Traffic noise source    | Acoustical variables                                                      | Noise ranges                                              | Non-acoustical variables                                                                  | Outcome                                                  |
|-------------|----------------------|-------------------------|---------------------------------------------------------------------------|-----------------------------------------------------------|-------------------------------------------------------------------------------------------|----------------------------------------------------------|
| [39]        | Laboratory study     | Road                    | $L_{Aeq}$                                                                 | 44 - 64 dB(A)                                             | Gender                                                                                    | Subjective and objective sleep quality, performance,     |
| [40]        | Field study          | Road                    | Number of events above threshold, $L_{Aeq}$ Measured outside              | Number of events above threshold: 75 – 85 dB(A)           | Noise sensitivity, medical symptoms, mood, etc.                                           | Self-reported Sleep disturbance, Long-term annoyance     |
| [41]        | Laboratory study     | Road                    | Number of events, Maximum $L_{Aeq}$                                       | Number of events: 4 – 128, Maximum $L_{Aeq}$ : 45 – 60 dB | Noise sensitivity                                                                         | Mood, performance, self-reported sleep disturbance, etc. |
| [42]        | Questionnaire survey | Railway                 | $DENL$ calculated for outside                                             | 40 – 90 dB(A)                                             | Assessment of transportation mode, concern about harmful effects, noise sensitivity, etc. | Long-term annoyance                                      |
| [43]        | Questionnaire survey | Road, railway           | $L_{Aeq}$ calculated for outside                                          | -                                                         | Subjective perception of noise load, noise disturbance, noise sensitivity, etc.           | Long-term annoyance                                      |
| [44]        | Field study          | Aircraft                | $L_{Aeq}$ , number of events above threshold, etc. calculated for outside | $L_{Aeq}$ daytime: 41 – 62 dB, nighttime: 24 – 57 dB      | Long-term annoyance, noise disturbance, aircraft-related fears, etc.                      | Short-term annoyance                                     |
| [45]        | Meta-Analysis        | Road, railway, aircraft | $DNL$ calculated for outside                                              | 45 – 75 dB(A)                                             | -                                                                                         | Long-term annoyance                                      |
| [46]        | Laboratory study     | Road, railway, aircraft | $L_{Amax}$ , frequency, $L_{Aeq}$                                         | $L_{Aeq}$ : 40 – 85 dB, $L_{Amax}$ : 42 – 95 dB           | Noise sensitivity, age, gender                                                            | Short-term annoyance                                     |

Table S4. (continued)

| Publication | Study setting       | Traffic noise source    | Acoustical variables                                                            | Noise ranges                                                                  | Non-acoustical variables                                                                           | Outcome                            |
|-------------|---------------------|-------------------------|---------------------------------------------------------------------------------|-------------------------------------------------------------------------------|----------------------------------------------------------------------------------------------------|------------------------------------|
| [47]        | Laboratory study    | Road, railway, aircraft | $L_{Amax}$ , $L_{Aeq}$ , duration, rise time                                    | $L_{Amax}$ : 70 and 80 dB(A), $L_{Aeq}$ : 48 – 64 dB                          | Noise sensitivity, general annoyance                                                               | Short-term annoyance               |
| [48]        | Questionnaire study | Road, railway, aircraft | -                                                                               | -                                                                             | Social status, owner vs tenant of the residence, <del>marital</del> <a href="#">marital</a> status | Long-term annoyance                |
| [49]        | Laboratory study    | Road, railway           | $L_{Aeq}$                                                                       | 50 – 55 dB(A)                                                                 | -                                                                                                  | Loudness                           |
| [50]        | Meta-Analysis       | Road, railway, aircraft | <a href="#">Noise and Number Index (NNI)</a> , $L_{Aeq}$ calculated for outside | <a href="#">NNI: 15 – 65 dB</a> , <a href="#">L<sub>Aeq</sub>: 30 – 80 dB</a> | <a href="#">Attitudes, timing of noise events, experience with noise source, etc.</a>              | Long-term annoyance                |
| [51]        | Laboratory study    | Road                    | $SEL$ , frequency,                                                              | Civil vehicles $SEL$ indoors: 40 – 67 dB(A), $SEL$ outdoors: 54 – 81 dB(A)    | -                                                                                                  | Short-term annoyance               |
| [52]        | Review              | -                       | $L_{Aeq}$                                                                       | -                                                                             | Noise sensitivity, general attitudes, local circumstances, etc.                                    | Short-term and long-term annoyance |
