# Supplementary material for: Short-Term Annoyance Due to Night-Time Road, Railway, and Air Traffic Noise: Role of the Noise Source, the Acoustical Metric, and Non-Acoustical Factors
Source: MDPI journal article supplement (doi:10.3390/ijerph18094647), 2021-04-27
Supplement: s1 [file s1]

**Table S2.** Acoustical variables of nocturnal road traffic noise exposure and their association with the binary annoyance variable. Results are generated by Generalized Estimating Equations (GEE) analyses.

| Acoustical variable                                  | Description                                                                                                                                                                                                                           | Estimate (SE) | p value | OR    | OR 95% CI [lower, upper] | QIC     |
|------------------------------------------------------|---------------------------------------------------------------------------------------------------------------------------------------------------------------------------------------------------------------------------------------|---------------|---------|-------|--------------------------|---------|
| $L_{Aeq,night}$                                      | A-weighted energy equivalent sound pressure level ( $L_{Aeq}$ ) of road traffic noise exposure inside bedroom throughout time in bed in dB. This value was based on calculations of the acoustic data recorded inside*.               | 0.057 (0.027) | 0.037   | 1.058 | 1.003, 1.116             | 216.265 |
| Number of nocturnal road traffic noise events        | Number of road traffic noise events based on information of traffic counter                                                                                                                                                           | 0.002 (0.001) | 0.118   | 1.002 | 1.000, 1.004             | 192.414 |
| Total duration of nocturnal road traffic noise [min] | Overall duration of traffic noise exposure per night in minutes based on calculations of the acoustic data recorded inside*.                                                                                                          | 0.001 (0.006) | 0.894   | 1.001 | .989, 1.012              | 223.336 |
| $SNR_{night}$                                        | Signal to Noise Ratio across the night, with $L_{Aeq,night}$ defined as “signal” and the background noise of the whole night defined as “noise” in dB. This value was based on calculations of the acoustic data recorded inside*.    | 0.658 (1.271) | 0.604   | 1.932 | 0.160, 23.317            | 222.734 |
| $max L_{Amax,night}$                                 | For each single pass-by per night, the maximum sound pressure level was computed ( $L_{Amax}$ ). This value is the maximum of $L_{Amax}$ of all pass-bys per night in dB based on calculations of the acoustic data recorded inside*. | 0.014 (0.020) | 0.441   | 1.014 | 0.978, 1.052             | 220.603 |
| mean $L_{Amax,night}$                                | The mean of $L_{Amax}$ of all pass-bys per night in dB based on calculations of the acoustic data recorded inside*.                                                                                                                   | 0.039 (0.023) | 0.082   | 1.040 | 0.995, 1.087             | 217.593 |
| $NAT_{25,night}$                                     | Number of pass-bys with a maximum level > 25 dB per night based on calculations of the acoustic data recorded inside*.                                                                                                                | 0.003 (0.002) | 0.212   | 1.003 | 0.998, 1.007             | 220.902 |
| $NAT_{30,night}$                                     | Number of pass-bys with a maximum level > 30 dB per night based on calculations of the acoustic data recorded inside*.                                                                                                                | 0.003 (0.002) | 0.125   | 1.003 | 0.999, 1.007             | 217.522 |
| $NAT_{35,night}$                                     | Number of pass-bys with a maximum level > 35 dB per night based on calculations of the acoustic data recorded inside*.                                                                                                                | 0.003 (0.002) | 0.111   | 1.003 | 0.999, 1.006             | 215.771 |
| $NAT_{40,night}$                                     | Number of pass-bys with a maximum level > 40 dB per night based on calculations of the acoustic data recorded inside*.                                                                                                                | 0.002 (0.002) | 0.193   | 1.002 | 0.999, 1.005             | 218.055 |
| $NAT_{45,night}$                                     | Number of pass-bys with a maximum level > 45 dB per night based on calculations of the acoustic data recorded inside*.                                                                                                                | 0.002 (0.002) | 0.185   | 1.002 | 0.999, 1.005             | 219.187 |

**Table S2.** (continued)

| Acoustical variable           | Description                                                                                                            | Estimate<br>(SE) | p<br>value | OR    | OR<br>95% CI<br>[lower,<br>upper] | QIC     |
|-------------------------------|------------------------------------------------------------------------------------------------------------------------|------------------|------------|-------|-----------------------------------|---------|
| <i>NAT<sub>50,night</sub></i> | Number of pass-bys with a maximum level > 50 dB per night based on calculations of the acoustic data recorded inside*. | 0.002<br>(0.002) | 0.343      | 1.002 | 0.998,<br>1.005                   | 219.978 |
| <i>NAT<sub>55,night</sub></i> | Number of pass-bys with a maximum level > 55 dB per night based on calculations of the recorded acoustic data*.        | 0.001<br>(0.002) | 0.685      | 1.001 | 0.997,<br>1.004                   | 220.579 |
| <i>NAT<sub>60,night</sub></i> | Number of pass-bys with a maximum level > 60 dB per night based on calculations of the acoustic data recorded inside*. | 0.020<br>(0.011) | 0.061      | 1.021 | 0.999,<br>1.043                   | 219.772 |
| <i>NAT<sub>65,night</sub></i> | Number of pass-bys with a maximum level > 65 dB per night based on calculations of the acoustic data recorded inside*. | 0.135<br>(0.080) | 0.093      | 1.144 | 0.978,<br>1.339                   | 220.142 |

\* Contrary to the traffic counter, the acoustic program was not able to evaluate several closely spaced road traffic events. Therefore, those events were classified as vehicle columns and counted as one noise event.
